# Supplementary material for: Winter Wheat Cultivar Recommendation Based on Expected Environment Productivity
Source: MDPI journal article supplement (doi:10.3390/agriculture11060522), 2021-06-04
Supplement: s1 [file s1]

**Table S3.** Average winter wheat yields (t/ha) in trial locations - observed/recorded/measured (OBS), adjusted by linear mixed model (LMM) and assessed by explanatory, enironmental (ANCOVA) model (EEM)

| Location               | 2015  |       |      | 2016  |       |       | 2017  |       |       | 2018  |       |       | 2019  |       |      | Mean 2015-2019 |       |       |
|------------------------|-------|-------|------|-------|-------|-------|-------|-------|-------|-------|-------|-------|-------|-------|------|----------------|-------|-------|
|                        | Obs.  | LMM   | EEM  | Obs.  | LMM   | EEM   | Obs.  | LMM   | EEM   | Obs.  | LMM   | EEM   | Obs.  | LMM   | EEM  | Obs.           | LMM   | EEM   |
| Cicibór Duży           | 9.87  | 8.79  | 8.69 | 5.82  | 6.51  | 7.84  | 7.61  | 6.84  | 7.92  | 5.70  | 6.32  | 6.59  | 6.39  | 6.79  | 7.68 | 7.08           | 7.05  | 7.74  |
| Czesławice             | 10.41 | 9.37  | 8.90 | 7.48  | 8.14  | 8.51  | 9.19  | 8.41  | 8.09  | 9.88  | 10.49 | 9.54  | 8.13  | 8.54  | 8.52 | 9.02           | 8.99  | 8.71  |
| Głębokie               | 7.53  | 6.45  | 8.38 | 4.35  | 6.61  | 8.46  | 9.13  | 8.33  | 7.47  | 5.69  | 6.37  | 8.44  | 7.55  | 7.96  | 8.59 | 6.85           | 7.14  | 8.27  |
| Głubczyce              | 11.30 | 10.27 | 9.96 | 10.64 | 11.31 | 9.90  | 11.46 | 10.68 | 10.68 | 10.19 | 10.80 | 9.85  | 10.02 | 10.39 | 9.92 | 10.72          | 10.69 | 10.06 |
| Krościna Mała          | 9.93  | 8.85  | 8.39 | 7.27  | 7.95  | 7.35  | 8.78  | 7.98  | 8.63  | 9.56  | 10.19 | 7.63  | 8.37  | 8.74  | 8.59 | 8.78           | 8.74  | 8.12  |
| Marianowo              | 9.86  | 8.78  | 7.99 | n.d.  | n.d.  | n.d.  | 10.69 | 9.88  | 7.56  | 7.45  | 8.06  | 7.85  | 5.19  | 5.59  | 7.83 | 8.30           | 8.08  | 7.81  |
| Masłowice              | 8.17  | 7.13  | 6.35 | 7.14  | 7.82  | 7.98  | 10.19 | 9.38  | 8.84  | 7.32  | 7.98  | 7.78  | 8.21  | 8.61  | 8.22 | 8.21           | 8.18  | 7.83  |
| Nowa Wieś Ujska        | 8.69  | 7.60  | 7.49 | 5.12  | 5.80  | 7.93  | 6.93  | 6.13  | 7.78  | 6.14  | 6.83  | 6.95  | 6.19  | 6.58  | 8.08 | 6.61           | 6.59  | 7.65  |
| Pawłowice              | 8.79  | 7.70  | 8.86 | 6.22  | 6.89  | 8.21  | 7.88  | 7.10  | 9.21  | 4.94  | 5.63  | 7.87  | 7.02  | 7.47  | 8.70 | 6.97           | 6.96  | 8.57  |
| Radostowo              | 11.06 | 10.02 | 9.78 | 3.98  | 7.98  | 9.41  | 10.42 | 9.64  | 7.63  | 10.02 | 10.68 | 9.13  | 10.45 | 10.85 | 8.78 | 9.19           | 9.84  | 8.95  |
| Rarwino                | 9.25  | 8.16  | 8.04 | n.d.  | n.d.  | n.d.  | 8.57  | 7.80  | 8.26  | 6.66  | 7.29  | 7.73  | 7.42  | 7.83  | 7.62 | 7.98           | 7.77  | 7.91  |
| Rychliki               | 11.06 | 9.99  | 8.83 | 8.20  | 8.88  | 8.63  | 10.06 | 9.26  | 8.45  | 9.14  | 9.75  | 8.71  | 7.15  | 7.56  | 8.30 | 9.12           | 9.09  | 8.58  |
| Seroczyn               | 8.98  | 7.89  | 7.65 | 7.47  | 8.14  | 7.73  | 7.06  | 9.26  | 6.00  | 5.58  | 6.23  | 6.55  | 9.62  | 10.00 | 7.93 | 7.74           | 7.71  | 7.17  |
| Skołoszów              | 10.68 | 9.60  | 9.70 | 9.21  | 9.88  | 9.24  | 10.27 | 9.46  | 9.58  | 8.66  | 9.27  | 9.12  | 8.30  | 8.69  | 9.65 | 9.42           | 9.38  | 9.46  |
| Słupia                 | 11.25 | 10.19 | 9.26 | 7.96  | 8.80  | 8.67  | 11.27 | 10.49 | 10.29 | 10.45 | 11.01 | 8.78  | 9.25  | 9.62  | 9.21 | 10.04          | 10.02 | 9.24  |
| Świebodzin             | 12.00 | 10.92 | 7.62 | 9.19  | 9.86  | 8.27  | n.d.  | n.d.  | n.d.  | 6.85  | 7.44  | 7.66  | 7.48  | 7.88  | 7.73 | 8.88           | 9.02  | 7.82  |
| Tomaszów Bolesławiecki | 7.10  | 6.02  | 5.89 | 6.46  | 7.13  | 6.65  | 6.96  | 6.16  | 7.51  | 3.27  | 3.92  | 5.93  | 5.28  | 5.66  | 7.32 | 5.81           | 5.78  | 6.66  |
| Węgrzce                | 7.33  | 6.29  | 9.65 | 10.27 | 10.94 | 11.10 | 10.31 | 9.59  | 10.55 | 8.87  | 9.52  | 10.24 | 8.44  | 8.84  | 9.36 | 9.04           | 9.04  | 10.18 |
| Zybiszów               | 8.56  | 7.51  | 8.06 | 9.44  | 10.12 | 9.09  | 9.27  | 8.48  | 9.19  | 9.93  | 10.57 | 8.17  | 10.87 | 11.23 | 8.74 | 9.61           | 9.58  | 8.65  |
| MEAN                   | 9.57  | 8.50  | 8.39 | 7.42  | 8.40  | 8.52  | 9.23  | 8.43  | 8.54  | 7.70  | 8.34  | 8.13  | 7.96  | 8.36  | 8.46 | 8.38           | 8.40  | 8.39  |
