# Supplementary material for: Winter Wheat Cultivar Recommendation Based on Expected Environment Productivity
Source: MDPI journal article supplement (doi:10.3390/agriculture11060522), 2021-06-04
Supplement: s1 [file s1]

**Table S4.** The complete list of cultivars which were used in analysis with estimated yields at determined average productivity level.

| Cultivar   | Mean winter wheat productivity level t/ha |      |             |      |             |      |             |      |              |      |              |      |
|------------|-------------------------------------------|------|-------------|------|-------------|------|-------------|------|--------------|------|--------------|------|
|            | 6                                         |      | 7           |      | 8           |      | 9           |      | 10           |      | 11           |      |
|            | $Y_{ecv}$                                 | Rank | $Y_{ecv}$   | Rank | $Y_{ecv}$   | Rank | $Y_{ecv}$   | Rank | $Y_{ecv}$    | Rank | $Y_{ecv}$    | Rank |
| Apostel    | 6.25                                      | (18) | 7.27        | (14) | 8.28        | (15) | 9.30        | (13) | 10.32        | (14) | 11.33        | (12) |
| Arkadia    | 5.72                                      | (77) | 6.84        | (75) | 7.96        | (63) | 9.08        | (44) | 10.20        | (24) | 11.32        | (16) |
| Arktis     | 5.63                                      | (83) | 6.59        | (85) | 7.55        | (87) | 8.51        | (90) | 9.47         | (90) | 10.43        | (92) |
| Artist     | <b>6.49</b>                               | (2)  | <b>7.48</b> | (2)  | <b>8.46</b> | (2)  | <b>9.45</b> | (3)  | <b>10.44</b> | (4)  | <b>11.43</b> | (5)  |
| Askalon    | 6.11                                      | (37) | 7.11        | (35) | 8.10        | (38) | 9.09        | (43) | 10.08        | (45) | <b>11.07</b> | (45) |
| Astoria    | 5.15                                      | (92) | 6.23        | (92) | 7.30        | (92) | 8.38        | (91) | 9.45         | (91) | 10.53        | (88) |
| Bamberka   | 5.52                                      | (88) | 6.55        | (88) | 7.58        | (85) | 8.61        | (82) | 9.65         | (80) | 10.68        | (81) |
| Bartosz    | <b>6.16</b>                               | (31) | 7.17        | (30) | 8.17        | (27) | 9.18        | (24) | <b>10.19</b> | (25) | <b>11.19</b> | (27) |
| Belissa    | 6.15                                      | (32) | 7.16        | (31) | 8.16        | (29) | 9.17        | (27) | <b>10.17</b> | (26) | <b>11.18</b> | (29) |
| Błyskawica | <b>6.39</b>                               | (9)  | <b>7.42</b> | (8)  | <b>8.44</b> | (4)  | <b>9.47</b> | (1)  | <b>10.49</b> | (1)  | <b>11.52</b> | (3)  |
| Bogatka    | 5.68                                      | (78) | 6.71        | (78) | 7.74        | (77) | 8.77        | (76) | 9.79         | (74) | 10.82        | (74) |
| Bonanza    | <b>6.25</b>                               | (19) | 7.19        | (27) | 8.12        | (33) | 9.06        | (48) | 10.00        | (55) | 10.94        | (63) |
| Ceres      | 4.22                                      | (94) | 5.18        | (94) | 6.13        | (94) | 7.09        | (94) | 8.04         | (94) | 9.00         | (94) |
| Comandor   | 6.04                                      | (52) | 7.07        | (47) | 8.10        | (39) | 9.12        | (34) | 10.15        | (31) | <b>11.18</b> | (28) |
| Consus     | 5.86                                      | (71) | 6.89        | (68) | 7.91        | (68) | 8.94        | (64) | 9.97         | (59) | 11.00        | (55) |
| Dakar      | 6.02                                      | (55) | 7.01        | (58) | 8.00        | (58) | 8.99        | (60) | 9.97         | (58) | 10.96        | (58) |
| Delawar    | 5.99                                      | (59) | 7.03        | (54) | 8.08        | (44) | 9.12        | (36) | 10.16        | (29) | <b>11.20</b> | (24) |
| Dolores    | 6.06                                      | (48) | 7.08        | (43) | 8.10        | (37) | 9.12        | (35) | 10.14        | (34) | <b>11.16</b> | (31) |
| Estivus    | 5.83                                      | (74) | 6.78        | (77) | 7.72        | (78) | 8.67        | (80) | 9.61         | (83) | 10.56        | (85) |
| Euforia    | <b>6.35</b>                               | (12) | <b>7.35</b> | (11) | <b>8.34</b> | (11) | <b>9.34</b> | (12) | <b>10.33</b> | (12) | <b>11.33</b> | (14) |
| Fakir      | 6.15                                      | (33) | 7.09        | (39) | 8.03        | (53) | 8.98        | (62) | 9.92         | (67) | 10.86        | (68) |
| Fidelius   | 5.94                                      | (66) | 6.96        | (63) | 7.98        | (61) | 9.00        | (56) | 10.03        | (53) | <b>11.05</b> | (51) |
| Figura     | 5.59                                      | (86) | 6.62        | (82) | 7.64        | (80) | 8.67        | (79) | 9.70         | (78) | 10.73        | (77) |
| Florencia  | 6.05                                      | (50) | 7.05        | (49) | 8.06        | (50) | 9.06        | (47) | 10.07        | (47) | <b>11.07</b> | (44) |
| Florus     | 6.01                                      | (57) | 7.00        | (60) | 7.98        | (60) | 8.97        | (63) | 9.96         | (62) | 10.94        | (62) |
| Formacja   | 6.07                                      | (47) | 7.08        | (46) | 8.08        | (42) | 9.09        | (42) | 10.10        | (42) | <b>11.11</b> | (38) |
| Forum      | 6.09                                      | (41) | 7.10        | (37) | 8.12        | (35) | 9.13        | (33) | 10.14        | (33) | <b>11.16</b> | (33) |
| Franz      | <b>6.34</b>                               | (13) | <b>7.31</b> | (13) | 8.28        | (14) | <b>9.26</b> | (18) | <b>10.23</b> | (22) | <b>11.21</b> | (23) |
| Frisky     | <b>6.20</b>                               | (26) | <b>7.27</b> | (15) | <b>8.33</b> | (12) | <b>9.39</b> | (8)  | <b>10.46</b> | (3)  | <b>11.52</b> | (1)  |
| Gimantis   | 6.10                                      | (39) | 7.11        | (33) | 8.12        | (32) | 9.14        | (31) | 10.15        | (32) | <b>11.16</b> | (32) |
| Hondia     | 6.14                                      | (35) | 7.09        | (38) | 8.05        | (51) | 9.01        | (54) | 9.97         | (60) | 10.93        | (65) |
| Hybery     | <b>6.47</b>                               | (3)  | <b>7.46</b> | (3)  | <b>8.45</b> | (3)  | <b>9.44</b> | (4)  | <b>10.43</b> | (6)  | <b>11.42</b> | (6)  |
| Janosch    | 6.08                                      | (44) | 7.08        | (41) | 8.09        | (41) | 9.10        | (41) | 10.10        | (40) | <b>11.11</b> | (37) |
| Jantarka   | 6.05                                      | (51) | 7.05        | (50) | 8.06        | (48) | 9.07        | (45) | 10.08        | (44) | <b>11.09</b> | (42) |
| Julius     | 5.86                                      | (70) | 6.86        | (74) | 7.85        | (75) | 8.84        | (73) | 9.84         | (73) | 10.83        | (72) |
| Kepler     | 6.08                                      | (43) | 7.03        | (55) | 7.98        | (62) | 8.93        | (66) | 9.88         | (69) | 10.83        | (73) |
| Kometa     | 6.03                                      | (53) | 7.02        | (57) | 8.01        | (57) | 9.00        | (58) | 9.98         | (57) | 10.97        | (57) |
| Kredo      | <b>6.45</b>                               | (5)  | <b>7.43</b> | (5)  | <b>8.41</b> | (9)  | <b>9.39</b> | (10) | <b>10.37</b> | (10) | <b>11.34</b> | (9)  |
| KWS        | 6.14                                      | (34) | 7.11        | (34) | 8.07        | (45) | 9.03        | (53) | 10.00        | (56) | 10.96        | (59) |
| KWS        | <b>6.30</b>                               | (14) | <b>7.25</b> | (18) | 8.20        | (24) | 9.15        | (29) | 10.10        | (41) | <b>11.05</b> | (49) |
| KWS        | 5.94                                      | (65) | 6.90        | (67) | 7.86        | (73) | 8.83        | (74) | 9.79         | (75) | 10.75        | (76) |

| Cultivar    | Mean winter wheat productivity level t/ha |      |             |      |             |      |             |      |              |      |              |      |
|-------------|-------------------------------------------|------|-------------|------|-------------|------|-------------|------|--------------|------|--------------|------|
|             | 6                                         |      | 7           |      | 8           |      | 9           |      | 10           |      | 11           |      |
|             | $Y_{ecu}$                                 | Rank | $Y_{ecu}$   | Rank | $Y_{ecu}$   | Rank | $Y_{ecu}$   | Rank | $Y_{ecu}$    | Rank | $Y_{ecu}$    | Rank |
| KWS Kiran   | <b>6.37</b>                               | (10) | <b>7.34</b> | (12) | <b>8.31</b> | (13) | <b>9.28</b> | (15) | <b>10.25</b> | (18) | <b>11.22</b> | (22) |
| KWS Livius  | 5.81                                      | (75) | 6.88        | (71) | 7.94        | (65) | 9.01        | (55) | 10.08        | (46) | <b>11.14</b> | (35) |
| KWS Loft    | 6.10                                      | (40) | 7.09        | (40) | 8.08        | (43) | 9.07        | (46) | 10.06        | (48) | <b>11.05</b> | (50) |
| KWS Magic   | 5.66                                      | (80) | 6.64        | (81) | 7.62        | (82) | 8.60        | (83) | 9.58         | (85) | 10.56        | (84) |
| KWS         | 5.63                                      | (84) | 6.61        | (84) | 7.59        | (83) | 8.58        | (85) | 9.56         | (86) | 10.54        | (86) |
| KWS Ozon    | 5.99                                      | (58) | 7.01        | (59) | 8.02        | (55) | 9.04        | (52) | 10.05        | (50) | <b>11.07</b> | (46) |
| KWS         | 6.06                                      | (49) | 7.03        | (52) | 8.01        | (56) | 8.99        | (59) | 9.97         | (61) | 10.95        | (61) |
| Lavantus    | 5.65                                      | (81) | 6.66        | (79) | 7.67        | (79) | 8.68        | (78) | 9.69         | (79) | 10.70        | (79) |
| Leandrus    | 5.90                                      | (68) | 6.88        | (69) | 7.87        | (72) | 8.86        | (72) | 9.85         | (72) | 10.84        | (71) |
| Legenda     | 5.11                                      | (93) | 6.20        | (93) | 7.28        | (93) | 8.37        | (92) | 9.45         | (92) | 10.53        | (87) |
| LG Jutta    | 5.97                                      | (62) | 6.92        | (66) | 7.86        | (74) | 8.80        | (75) | 9.74         | (77) | 10.69        | (80) |
| Lindbergh   | 6.10                                      | (38) | 7.10        | (36) | 8.10        | (36) | 9.10        | (40) | 10.10        | (39) | <b>11.10</b> | (39) |
| Linus       | <b>6.41</b>                               | (8)  | <b>7.40</b> | (9)  | <b>8.40</b> | (10) | <b>9.39</b> | (7)  | <b>10.39</b> | (7)  | <b>11.39</b> | (7)  |
| Markiza     | 5.46                                      | (89) | 6.50        | (89) | 7.54        | (89) | 8.58        | (84) | 9.62         | (82) | 10.66        | (82) |
| Medalistka  | 6.07                                      | (46) | 7.08        | (44) | 8.09        | (40) | 9.11        | (38) | 10.12        | (36) | <b>11.14</b> | (36) |
| Meister     | <b>6.17</b>                               | (29) | 7.15        | (32) | 8.13        | (31) | 9.10        | (39) | 10.08        | (43) | <b>11.06</b> | (48) |
| Mirek       | <b>6.30</b>                               | (15) | <b>7.26</b> | (16) | 8.22        | (23) | 9.17        | (26) | 10.13        | (35) | <b>11.09</b> | (41) |
| Mulan       | 5.99                                      | (60) | 7.05        | (51) | 8.12        | (34) | 9.19        | (23) | <b>10.25</b> | (17) | <b>11.32</b> | (15) |
| Muszelka    | 6.09                                      | (42) | 7.08        | (45) | 8.07        | (47) | 9.06        | (49) | 10.05        | (51) | <b>11.04</b> | (52) |
| Natula      | 5.88                                      | (69) | 6.88        | (70) | 7.88        | (70) | 8.89        | (71) | 9.89         | (68) | 10.89        | (66) |
| Nordkap     | <b>6.23</b>                               | (23) | 7.21        | (25) | 8.19        | (25) | 9.18        | (25) | 10.16        | (28) | <b>11.15</b> | (34) |
| Ohio        | 6.13                                      | (36) | 7.08        | (42) | 8.03        | (54) | 8.99        | (61) | 9.94         | (65) | 10.89        | (67) |
| Opcja       | <b>6.21</b>                               | (25) | 7.23        | (23) | 8.25        | (18) | <b>9.27</b> | (16) | <b>10.29</b> | (15) | <b>11.31</b> | (18) |
| Ostroga     | 5.64                                      | (82) | 6.61        | (83) | 7.59        | (84) | 8.56        | (86) | 9.53         | (87) | 10.51        | (90) |
| Owacja      | 6.07                                      | (45) | 7.07        | (48) | 8.06        | (49) | 9.05        | (50) | 10.05        | (52) | 11.04        | (53) |
| Oxal        | <b>6.26</b>                               | (16) | <b>7.25</b> | (20) | 8.23        | (22) | 9.22        | (22) | <b>10.21</b> | (23) | <b>11.20</b> | (26) |
| Patras      | <b>6.17</b>                               | (30) | 7.17        | (29) | 8.17        | (28) | 9.17        | (28) | <b>10.17</b> | (27) | <b>11.17</b> | (30) |
| Pengar      | 5.66                                      | (79) | 6.65        | (80) | 7.63        | (81) | 8.62        | (81) | 9.60         | (84) | 10.59        | (83) |
| Platin      | 5.97                                      | (64) | 6.95        | (64) | 7.92        | (67) | 8.90        | (70) | 9.87         | (71) | 10.85        | (69) |
| Plejada     | <b>6.24</b>                               | (21) | 7.24        | (22) | 8.24        | (20) | 9.25        | (21) | <b>10.25</b> | (20) | <b>11.25</b> | (20) |
| Pokusa      | 5.98                                      | (61) | 7.03        | (56) | 8.07        | (46) | 9.11        | (37) | 10.16        | (30) | <b>11.20</b> | (25) |
| Praktik     | <b>6.19</b>                               | (27) | 7.18        | (28) | 8.16        | (30) | 9.14        | (32) | 10.12        | (37) | <b>11.10</b> | (40) |
| Reduta      | 5.60                                      | (85) | 6.58        | (86) | 7.55        | (86) | 8.53        | (89) | 9.51         | (89) | 10.49        | (91) |
| RGT Bilanz  | <b>6.36</b>                               | (11) | <b>7.39</b> | (10) | <b>8.42</b> | (6)  | <b>9.46</b> | (2)  | <b>10.49</b> | (2)  | <b>11.52</b> | (2)  |
| RGT Kicker  | 5.97                                      | (63) | 6.98        | (62) | 7.99        | (59) | 9.00        | (57) | 10.01        | (54) | 11.02        | (54) |
| RGT         | <b>6.26</b>                               | (17) | <b>7.25</b> | (17) | 8.25        | (17) | 9.25        | (20) | <b>10.24</b> | (21) | <b>11.24</b> | (21) |
| RGT         | 6.03                                      | (54) | 7.03        | (53) | 8.04        | (52) | 9.05        | (51) | 10.06        | (49) | <b>11.07</b> | (47) |
| Rivero      | <b>6.18</b>                               | (28) | 7.21        | (24) | 8.24        | (21) | <b>9.26</b> | (17) | <b>10.29</b> | (16) | <b>11.32</b> | (17) |
| Rockefeller | 5.30                                      | (91) | 6.31        | (91) | 7.32        | (91) | 8.33        | (93) | 9.34         | (93) | 10.35        | (93) |
| Rotax       | <b>6.60</b>                               | (1)  | <b>7.55</b> | (1)  | <b>8.49</b> | (1)  | <b>9.44</b> | (5)  | <b>10.38</b> | (8)  | <b>11.33</b> | (13) |
| Sailor      | 5.78                                      | (76) | 6.78        | (76) | 7.77        | (76) | 8.76        | (77) | 9.76         | (76) | 10.75        | (75) |
| Sfera       | <b>6.25</b>                               | (20) | <b>7.25</b> | (19) | 8.25        | (19) | 9.25        | (19) | <b>10.25</b> | (19) | <b>11.25</b> | (19) |
| Sikorka     | <b>6.42</b>                               | (7)  | <b>7.43</b> | (6)  | <b>8.43</b> | (5)  | <b>9.44</b> | (6)  | <b>10.44</b> | (5)  | <b>11.44</b> | (4)  |

| Cultivar   | Mean winter wheat productivity level t/ha |      |             |      |             |      |             |      |              |      |              |      |
|------------|-------------------------------------------|------|-------------|------|-------------|------|-------------|------|--------------|------|--------------|------|
|            | 6                                         |      | 7           |      | 8           |      | 9           |      | 10           |      | 11           |      |
|            | $Y_{ecv}$                                 | Rank | $Y_{ecv}$   | Rank | $Y_{ecv}$   | Rank | $Y_{ecv}$   | Rank | $Y_{ecv}$    | Rank | $Y_{ecv}$    | Rank |
| Silenus    | 5.57                                      | (87) | 6.56        | (87) | 7.55        | (88) | 8.54        | (88) | 9.52         | (88) | 10.51        | (89) |
| Skagen     | 6.02                                      | (56) | 6.98        | (61) | 7.95        | (64) | 8.91        | (68) | 9.88         | (70) | 10.85        | (70) |
| Speedway   | <b>6.24</b>                               | (22) | 7.21        | (26) | 8.17        | (26) | 9.14        | (30) | 10.11        | (38) | <b>11.08</b> | (43) |
| SY Orofino | <b>6.46</b>                               | (4)  | <b>7.43</b> | (4)  | <b>8.41</b> | (8)  | <b>9.38</b> | (11) | <b>10.36</b> | (11) | <b>11.34</b> | (11) |
| Titanus    | 5.83                                      | (73) | 6.86        | (72) | 7.89        | (69) | 8.92        | (67) | 9.95         | (63) | 10.97        | (56) |
| Tobak      | <b>6.22</b>                               | (24) | <b>7.25</b> | (21) | 8.27        | (16) | <b>9.29</b> | (14) | <b>10.32</b> | (13) | <b>11.34</b> | (10) |
| Tonacja    | 5.32                                      | (90) | 6.40        | (90) | 7.47        | (90) | 8.55        | (87) | 9.63         | (81) | 10.71        | (78) |
| Tulecka    | 5.83                                      | (72) | 6.86        | (73) | 7.88        | (71) | 8.91        | (69) | 9.93         | (66) | 10.95        | (60) |
| Tytanika   | 5.93                                      | (67) | 6.93        | (65) | 7.93        | (66) | 8.94        | (65) | 9.94         | (64) | 10.94        | (64) |
| Viborg     | <b>6.44</b>                               | (6)  | <b>7.42</b> | (7)  | <b>8.41</b> | (7)  | <b>9.39</b> | (9)  | <b>10.38</b> | (9)  | <b>11.37</b> | (8)  |
