# Supplementary material for: Winter Wheat Cultivar Recommendation Based on Expected Environment Productivity
Source: MDPI journal article supplement (doi:10.3390/agriculture11060522), 2021-06-04
Supplement: s1 [file s1]

**Table S1.** Selected information on locations of post-registration multi-environment trials (PVTs) over five cropping seasons (from 2014/2015 to 2018/2019).

| Location     | Longitude/<br>Latitude/<br>Altitude | Province *         | Cropping<br>Seasons | The Points Attributed to Arable<br>Land Suitability Group<br>(Designation) in 2018 | Soil pH | Drought    | No. of<br>cultivars | Mean<br>Yield<br>(t/ha) |
|--------------|-------------------------------------|--------------------|---------------------|------------------------------------------------------------------------------------|---------|------------|---------------------|-------------------------|
| Cicibór Duży | 23.117/<br>52.083/<br>114           | Lubelskie          | 2014/2015           | 70 (4. Very good for rye)                                                          | 5.9     | No drought | 48                  | 9.87                    |
|              |                                     |                    | 2015/2016           | 70 (4. Very good for rye)                                                          | 6.4     | No drought | 48                  | 5.82                    |
|              |                                     |                    | 2016/2017           | 70 (4. Very good for rye)                                                          | 5.9     | No drought | 53                  | 7.61                    |
|              |                                     |                    | 2017/2018           | 70 (4. Very good for rye)                                                          | 5.9     | 4          | 34                  | 5.70                    |
|              |                                     |                    | 2018/2019           | 70 (4. Very good for rye)                                                          | 5.9     | No drought | 41                  | 6.39                    |
| Czesławice   | 22.267/<br>51.317/<br>206           | Lubelskie          | 2014/2015           | 80 (2. Good for wheat)                                                             | 6.0     | No drought | 48                  | 10.41                   |
|              |                                     |                    | 2015/2016           | 80 (2. Good for wheat)                                                             | 6.1     | No drought | 48                  | 7.48                    |
|              |                                     |                    | 2016/2017           | 80 (2. Good for wheat)                                                             | 6.0     | No drought | 53                  | 9.19                    |
|              |                                     |                    | 2017/2018           | 94 (1. Very good for wheat)                                                        | 6.2     | No drought | 34                  | 9.88                    |
|              |                                     |                    | 2018/2019           | 80 (2. Good for wheat)                                                             | 6.1     | No drought | 41                  | 8.13                    |
| Głębokie     | 18.438/<br>52.645/<br>85            | Kujawsko-Pomorskie | 2014/2015           | 80 (2. Good for wheat)                                                             | 6.2     | No drought | 49                  | 7.53                    |
|              |                                     |                    | 2015/2016           | 80 (2. Good for wheat)                                                             | 6.2     | No drought | 35                  | 4.35                    |
|              |                                     |                    | 2016/2017           | 80 (2. Good for wheat)                                                             | 6.6     | No drought | 53                  | 9.13                    |
|              |                                     |                    | 2017/2018           | 80 (2. Good for wheat)                                                             | 6.3     | 2          | 35                  | 5.69                    |
|              |                                     |                    | 2018/2019           | 80 (2. Good for wheat)                                                             | 6.2     | No drought | 43                  | 7.55                    |
| Głubczyce    | 17.833/<br>50.183/<br>280           | Opolskie           | 2014/2015           | 94 (1. Very good for wheat)                                                        | 6.5     | No drought | 49                  | 11.30                   |
|              |                                     |                    | 2015/2016           | 94 (1. Very good for wheat)                                                        | 6.7     | No drought | 51                  | 10.64                   |
|              |                                     |                    | 2016/2017           | 94 (1. Very good for wheat)                                                        | 6.1     | No drought | 52                  | 11.46                   |
|              |                                     |                    | 2017/2018           | 94 (1. Very good for wheat)                                                        | 5.7     | No drought | 36                  | 10.19                   |
|              |                                     |                    | 2018/2019           | 94 (1. Very good for wheat)                                                        | 6.5     | No drought | 42                  | 10.02                   |

|                 |                           |               |           |                           |         |            |         |         |
|-----------------|---------------------------|---------------|-----------|---------------------------|---------|------------|---------|---------|
| Krościna Mała   | 16.950/<br>51.367/<br>106 | Dolnośląskie  | 2014/2015 | 80 (2. Good for wheat)    | 6.8     | No drought | 49      | 9.93    |
|                 |                           |               | 2015/2016 | 70 (4. Very good for rye) | 6.4     | No drought | 48      | 7.27    |
|                 |                           |               | 2016/2017 | 80 (2. Good for wheat)    | 6.0     | No drought | 54      | 8.78    |
|                 |                           |               | 2017/2018 | 70 (4. Very good for rye) | 6.9     | 3          | 38      | 9.56    |
|                 |                           |               | 2018/2019 | 80 (2. Good for wheat)    | 6.5     | No drought | 46      | 8.37    |
| Marianowo       | 22.117/<br>53.217/<br>140 | Podlaskie     | 2014/2015 | 70 (4. Very good for rye) | 5.9     | No drought | 48      | 9.86    |
|                 |                           |               | 2015/2016 | 52 (4. Good for rye)      | No data | No drought | No data | No data |
|                 |                           |               | 2016/2017 | 70 (4. Very good for rye) | 6.1     | No drought | 50      | 10.69   |
|                 |                           |               | 2017/2018 | 70 (4. Very good for rye) | 5.7     | 2          | 32      | 7.45    |
|                 |                           |               | 2018/2019 | 70 (4. Very good for rye) | 5.7     | No drought | 41      | 5.19    |
| Masłowice       | 18.633/<br>51.250/<br>174 | Łódzkie       | 2014/2015 | 52 (4. Good for rye)      | 6.1     | No drought | 48      | 8.17    |
|                 |                           |               | 2015/2016 | 70 (4. Very good for rye) | 6.1     | No drought | 47      | 7.14    |
|                 |                           |               | 2016/2017 | 70 (4. Very good for rye) | 6.4     | No drought | 50      | 10.19   |
|                 |                           |               | 2017/2018 | 70 (4. Very good for rye) | 6.5     | 2          | 35      | 7.32    |
|                 |                           |               | 2018/2019 | 70 (4. Very good for rye) | 6.1     | 2          | 42      | 8.21    |
| Nowa Wieś Ujska | 16.750/<br>53.033/<br>105 | Wielkopolskie | 2014/2015 | 70 (4. Very good for rye) | 6.1     | No drought | 49      | 8.69    |
|                 |                           |               | 2015/2016 | 70 (4. Very good for rye) | 5.6     | No drought | 49      | 5.12    |
|                 |                           |               | 2016/2017 | 70 (4. Very good for rye) | 6.2     | No drought | 52      | 6.93    |
|                 |                           |               | 2017/2018 | 70 (4. Very good for rye) | 5.4     | 5          | 37      | 6.14    |
|                 |                           |               | 2018/2019 | 70 (4. Very good for rye) | 5.9     | 2          | 44      | 6.19    |
| Pawłowice       | 18.483/<br>50.467/<br>240 | Śląskie       | 2014/2015 | 80 (2. Good for wheat)    | 6.1     | No drought | 48      | 8.79    |
|                 |                           |               | 2015/2016 | 80 (2. Good for wheat)    | 5.9     | No drought | 49      | 6.22    |
|                 |                           |               | 2016/2017 | 80 (2. Good for wheat)    | 6.3     | No drought | 56      | 7.88    |
|                 |                           |               | 2017/2018 | 80 (2. Good for wheat)    | 6.7     | No drought | 39      | 4.94    |
|                 |                           |               | 2018/2019 | 80 (2. Good for wheat)    | 6.5     | No drought | 41      | 7.02    |

|           |                           |                     |           |                             |         |            |         |         |
|-----------|---------------------------|---------------------|-----------|-----------------------------|---------|------------|---------|---------|
| Radostowo | 18.750/<br>53.983/<br>40  | Pomorskie           | 2014/2015 | 94 (1. Very good for wheat) | 6.5     | No drought | 49      | 11.06   |
|           |                           |                     | 2015/2016 | 94 (1. Very good for wheat) | 6.5     | No drought | 26      | 3.98    |
|           |                           |                     | 2016/2017 | 80 (2. Good for wheat)      | 7.0     | No drought | 52      | 10.42   |
|           |                           |                     | 2017/2018 | 94 (1. Very good for wheat) | 7.0     | No drought | 38      | 10.02   |
|           |                           |                     | 2018/2019 | 94 (1. Very good for wheat) | 6.9     | No drought | 45      | 10.45   |
| Rarwino   | 14.833/<br>53.933/10      | Zachodnio-Pomorskie | 2014/2015 | 70 (4. Very good for rye)   | 5.1     | No drought | 49      | 9.25    |
|           |                           |                     | 2015/2016 | No data                     | No data | No drought | No data | No data |
|           |                           |                     | 2016/2017 | 70 (4. Very good for rye)   | 6.6     | No drought | 60      | 8.57    |
|           |                           |                     | 2017/2018 | 70 (4. Very good for rye)   | 5.9     | 2          | 34      | 6.66    |
|           |                           |                     | 2018/2019 | 70 (4. Very good for rye)   | 5.9     | No drought | 43      | 7.42    |
| Rychliki  | 19.533/<br>53.983/<br>80  | Warmińsko-Mazurskie | 2014/2015 | 80 (2. Good for wheat)      | 5.7     | No drought | 48      | 11.06   |
|           |                           |                     | 2015/2016 | 80 (2. Good for wheat)      | 5.8     | No drought | 48      | 8.20    |
|           |                           |                     | 2016/2017 | 80 (2. Good for wheat)      | 5.8     | No drought | 51      | 10.06   |
|           |                           |                     | 2017/2018 | 80 (2. Good for wheat)      | 6.4     | 2          | 34      | 9.14    |
|           |                           |                     | 2018/2019 | 80 (2. Good for wheat)      | 6.0     | No drought | 42      | 7.15    |
| Seroczyn  | 21.933/<br>52.000/<br>150 | Mazowieckie         | 2014/2015 | 70 (4. Very good for rye)   | 6.6     | No drought | 48      | 8.98    |
|           |                           |                     | 2015/2016 | 70 (4. Very good for rye)   | 6.5     | No drought | 47      | 7.47    |
|           |                           |                     | 2016/2017 | 52 (4. Good for rye)        | 5.8     | No drought | 50      | 7.06    |
|           |                           |                     | 2017/2018 | 70 (4. Very good for rye)   | 6.8     | 4          | 35      | 5.58    |
|           |                           |                     | 2018/2019 | 70 (4. Very good for rye)   | 6.7     | No drought | 43      | 9.62    |
| Skołoszów | 22.733/<br>49.883/<br>230 | Podkarpackie        | 2014/2015 | 94 (1. Very good for wheat) | 5.7     | No drought | 48      | 10.68   |
|           |                           |                     | 2015/2016 | 94 (1. Very good for wheat) | 5.9     | No drought | 47      | 9.21    |
|           |                           |                     | 2016/2017 | 94 (1. Very good for wheat) | 5.9     | No drought | 52      | 10.27   |
|           |                           |                     | 2017/2018 | 80 (2. Good for wheat)      | 5.8     | No drought | 33      | 8.66    |
|           |                           |                     | 2018/2019 | 94 (1. Very good for wheat) | 6.5     | No drought | 41      | 8.30    |

|                           |                           |                |           |                             |     |            |         |         |
|---------------------------|---------------------------|----------------|-----------|-----------------------------|-----|------------|---------|---------|
| Słupia                    | 19.967/<br>50.633/<br>290 | Świętokrzyskie | 2014/2015 | 80 (2. Good for wheat)      | 5.6 | No drought | 48      | 11.25   |
|                           |                           |                | 2015/2016 | 80 (2. Good for wheat)      | 6.5 | No drought | 47      | 7.96    |
|                           |                           |                | 2016/2017 | 80 (2. Good for wheat)      | 4.8 | No drought | 53      | 11.27   |
|                           |                           |                | 2017/2018 | 80 (2. Good for wheat)      | 5.5 | No drought | 36      | 10.45   |
|                           |                           |                | 2018/2019 | 80 (2. Good for wheat)      | 6.1 | No drought | 46      | 9.25    |
| Świebodzin                | 15.583/<br>52.233/<br>90  | Lubuskie       | 2014/2015 | 61 (3. Limited for wheat)   | 5.2 | No drought | 47      | 12.00   |
|                           |                           |                | 2015/2016 | 61 (3. Limited for wheat)   | 4.9 | No drought | 49      | 9.19    |
|                           |                           |                | 2016/2017 | 80 (2. Good for wheat)      | 7.4 | No drought | No data | No data |
|                           |                           |                | 2017/2018 | 70 (4. Very good for rye)   | 4.9 | 4          | 33      | 6.85    |
|                           |                           |                | 2018/2019 | 70 (4. Very good for rye)   | 5.8 | 3          | 41      | 7.48    |
| Tomaszów<br>Bolesławiecki | 15.683/<br>51.283/<br>200 | Dolnośląskie   | 2014/2015 | 52 (4. Good for rye)        | 6.5 | No drought | 49      | 7.10    |
|                           |                           |                | 2015/2016 | 52 (4. Good for rye)        | 5.7 | No drought | 48      | 6.46    |
|                           |                           |                | 2016/2017 | 61 (3. Limited for wheat)   | 6.0 | No drought | 54      | 6.96    |
|                           |                           |                | 2017/2018 | 52 (4. Good for rye)        | 6.0 | No drought | 38      | 3.27    |
|                           |                           |                | 2018/2019 | 61 (3. Limited for wheat)   | 6.6 | No drought | 46      | 5.28    |
| Węgrzce                   | 19.983/<br>50.117/<br>285 | Małopolskie    | 2014/2015 | 94 (1. Very good for wheat) | 6.6 | No drought | 48      | 7.33    |
|                           |                           |                | 2015/2016 | 94 (1. Very good for wheat) | 5.8 | No drought | 47      | 10.27   |
|                           |                           |                | 2016/2017 | 94 (1. Very good for wheat) | 6.0 | No drought | 52      | 10.31   |
|                           |                           |                | 2017/2018 | 94 (1. Very good for wheat) | 6.1 | No drought | 36      | 8.87    |
|                           |                           |                | 2018/2019 | 94 (1. Very good for wheat) | 6.5 | No drought | 40      | 8.44    |
| Zybiszów                  | 16.917/<br>51.067/<br>130 | Dolnośląskie   | 2014/2015 | 80 (2. Good for wheat)      | 6.3 | No drought | 49      | 8.56    |
|                           |                           |                | 2015/2016 | 94 (1. Very good for wheat) | 6.5 | No drought | 48      | 9.44    |
|                           |                           |                | 2016/2017 | 94 (1. Very good for wheat) | 6.3 | No drought | 54      | 9.27    |
|                           |                           |                | 2017/2018 | 80 (2. Good for wheat)      | 6.4 | No drought | 38      | 9.93    |
|                           |                           |                | 2018/2019 | 80 (2. Good for wheat)      | 6.3 | No drought | 46      | 10.87   |

---

\* The first level administrative units of Poland (Polish: województwo, officially translated into English as voivodship). In the paper, we use the term province with the same meaning.
